# Supplementary material for: Stretchable reflective coating for soft optical waveguides and sensors
Source: Royal Society of Chemistry journal article supplement (doi:10.1039/d2sm00869f), 2022-01-01
Supplement: d2sm00869f1.pdf [file d2sm00869f1.pdf]

# Supporting Information

## Stretchable reflective coating for soft optical waveguides and sensors

Simone Lantean<sup>\*a</sup>, Matteo Lo Preti<sup>a,b</sup>, Lucia Beccai<sup>a</sup>

a- Soft Bio Robotics Perception, Istituto Italiano di Tecnologia (IIT), Genova, Italy

b- The Bio Robotics Institute, Scuola Superiore Sant'Anna, Pontedera, Italy

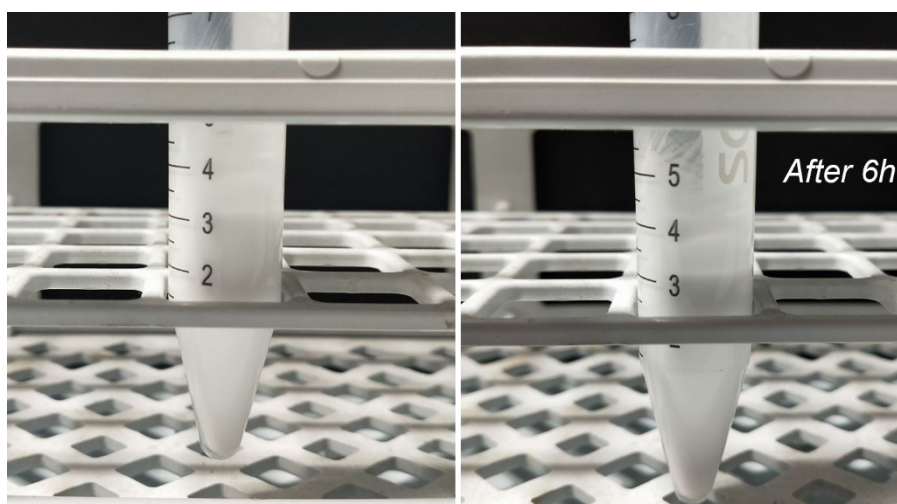

Figure S1: Evaluation of PDMS\_1vol.% TiO<sub>2</sub> stability after 6 hours.

### Neural network to predict TiO<sub>2</sub> particles concentration

The chosen feedforward neural network has 10 hidden neurons. Starting from the experimental data, a dataset augmentation procedure allowed us to obtain an input set of 1845371 samples and 3 features (i.e., layer width, wavelength, and transmittance). This dataset was randomly divided into training, validation, and test sets with a ratio of 70%, 15%, and 15%. The network was trained using the Levenberg-Marquardt backpropagation optimization algorithm and the mean square error to evaluate the performance.

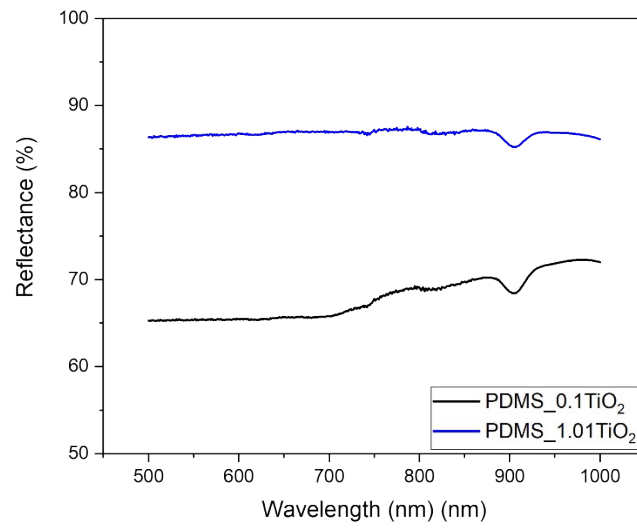

Figure S2: Sketch of the experimental devices used to evaluate the reflecting properties of PDMS film filled with 1.00 vol.% of TiO<sub>2</sub> particles.

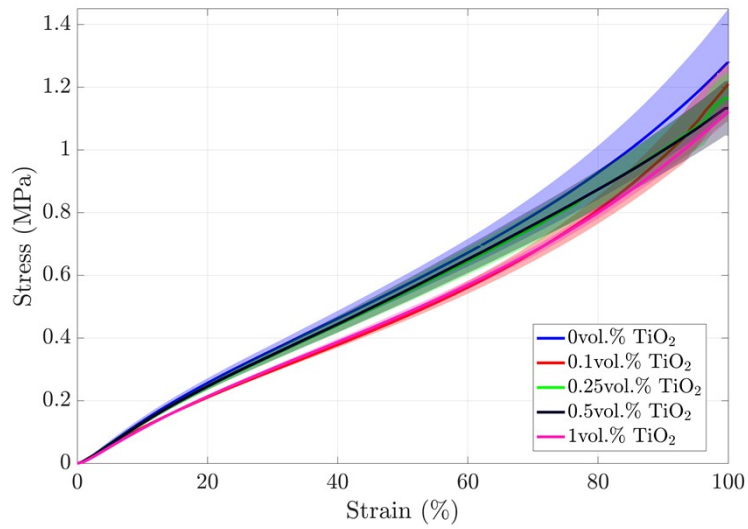

Figure S3: Stress vs Strain curves of PDMS samples at increasing TiO<sub>2</sub> particles concentrations (0.1, 0.25, 0.50, and 1.00 vol%). The filled portion of the curves represents the standard deviation of the measurements.

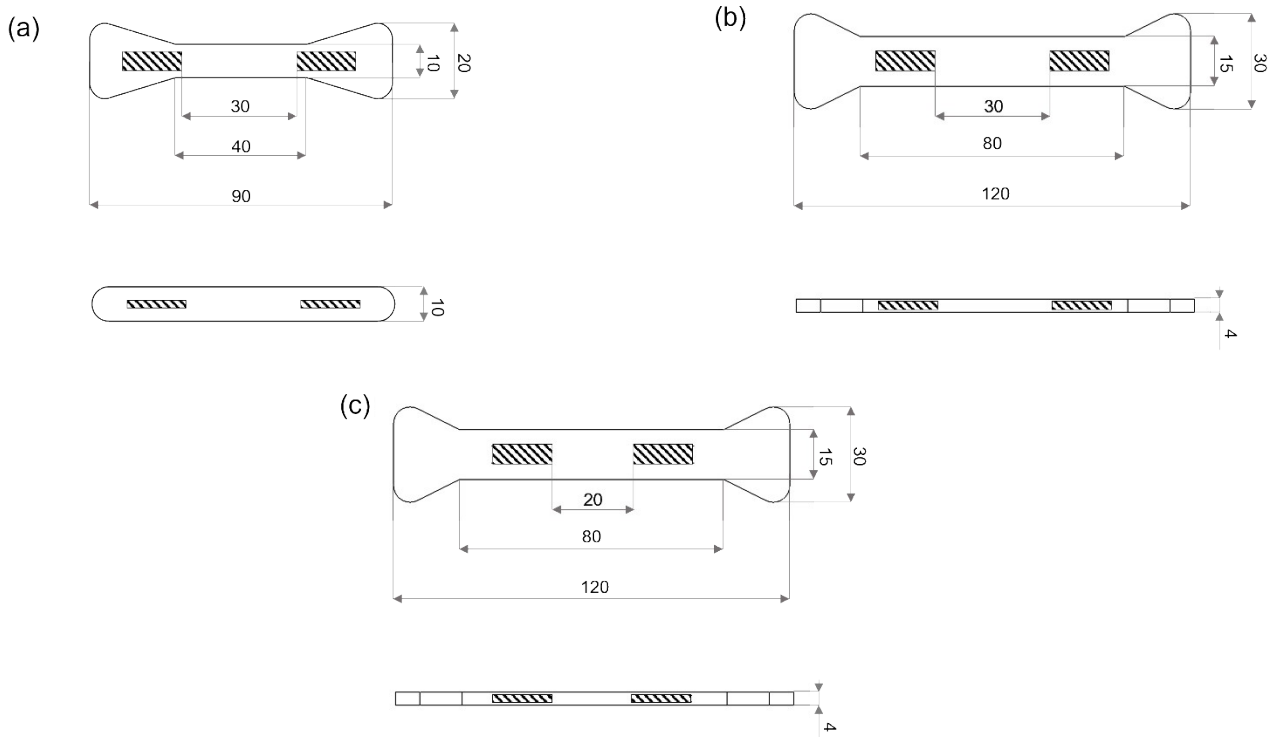

Figure S4: Sketch and dimensions of transparent a) rectangular waveguide, b) circular waveguide, and c) the strain sensor.

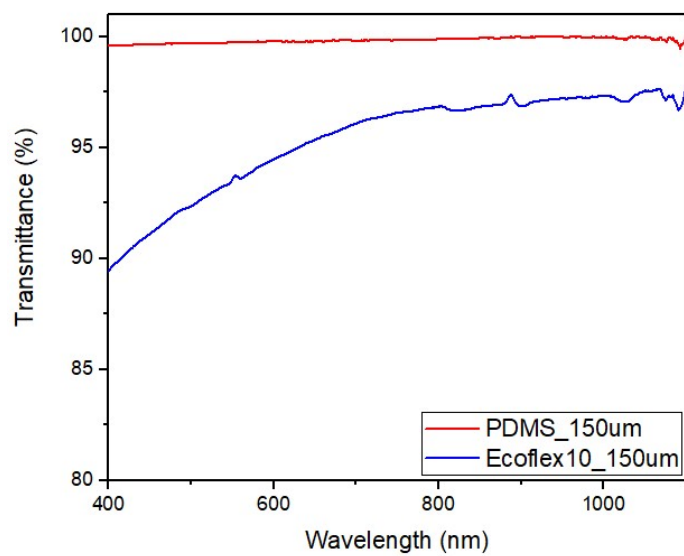

Figure S5: UV-Vis-NIR spectra of 150um thick films of pristine PDMS and Ecoflex0010.
